# Supplementary material
Source: publisher figshare collection journal article supplement (https://acs.figshare.com/ndownloader/files/4552906)
Supplement: Supplementary file 1 [file 4552906]

## SUPPORTING INFORMATION

## Alkaloids from the Roots of *Stemona aphylla* (Stemonaceae)

# Pitchaya Mungkornasawakul,*†,‡,┴ Sukanda Chaiyong,§ Thanapat Sastraruji,§ Araya Jatisatienr,§ Chaiwat Jatisatienr,§ Stephen G. Pyne,† Alison T. Ung,† John Korth,† and Wilford Lie†

Department of Chemistry, University of Wollongong, Wollongong, New South Wales, 2522, Australia, Division of Environmental Sciences, Chiang Mai University, Chiang Mai 50202, Thailand, Department of Biology, Chiang Mai University, Chiang Mai 50202, Thailand, and Department of Chemistry, Chiang Mai University, Chiang Mai 50202, Thailand

------------------------------------------------------------------------------------------------------

† School of Chemistry, University of Wollongong.

‡ Division of Environmental Sciences, Chiang Mai University.

┴Department of Chemistry, Chiang Mai University.

§Department of Biology, Chiang Mai University.

**Table of Contents:**

1H NMR (CDCl3) of **4**  SI-2

1H NMR (CDCl3) of **5** SI-3

Table ofHMBCcorrelations for Compounds **4** and **5** SI-4

GC-MS trace of the crude CH2Cl2 extract SI-5

Table of EIMS details SI-5

Tables of the biological activities of the CH2Cl2 extract and **4** SI-6

SI-1

**1H NMR (CDCl3) of 4**

**
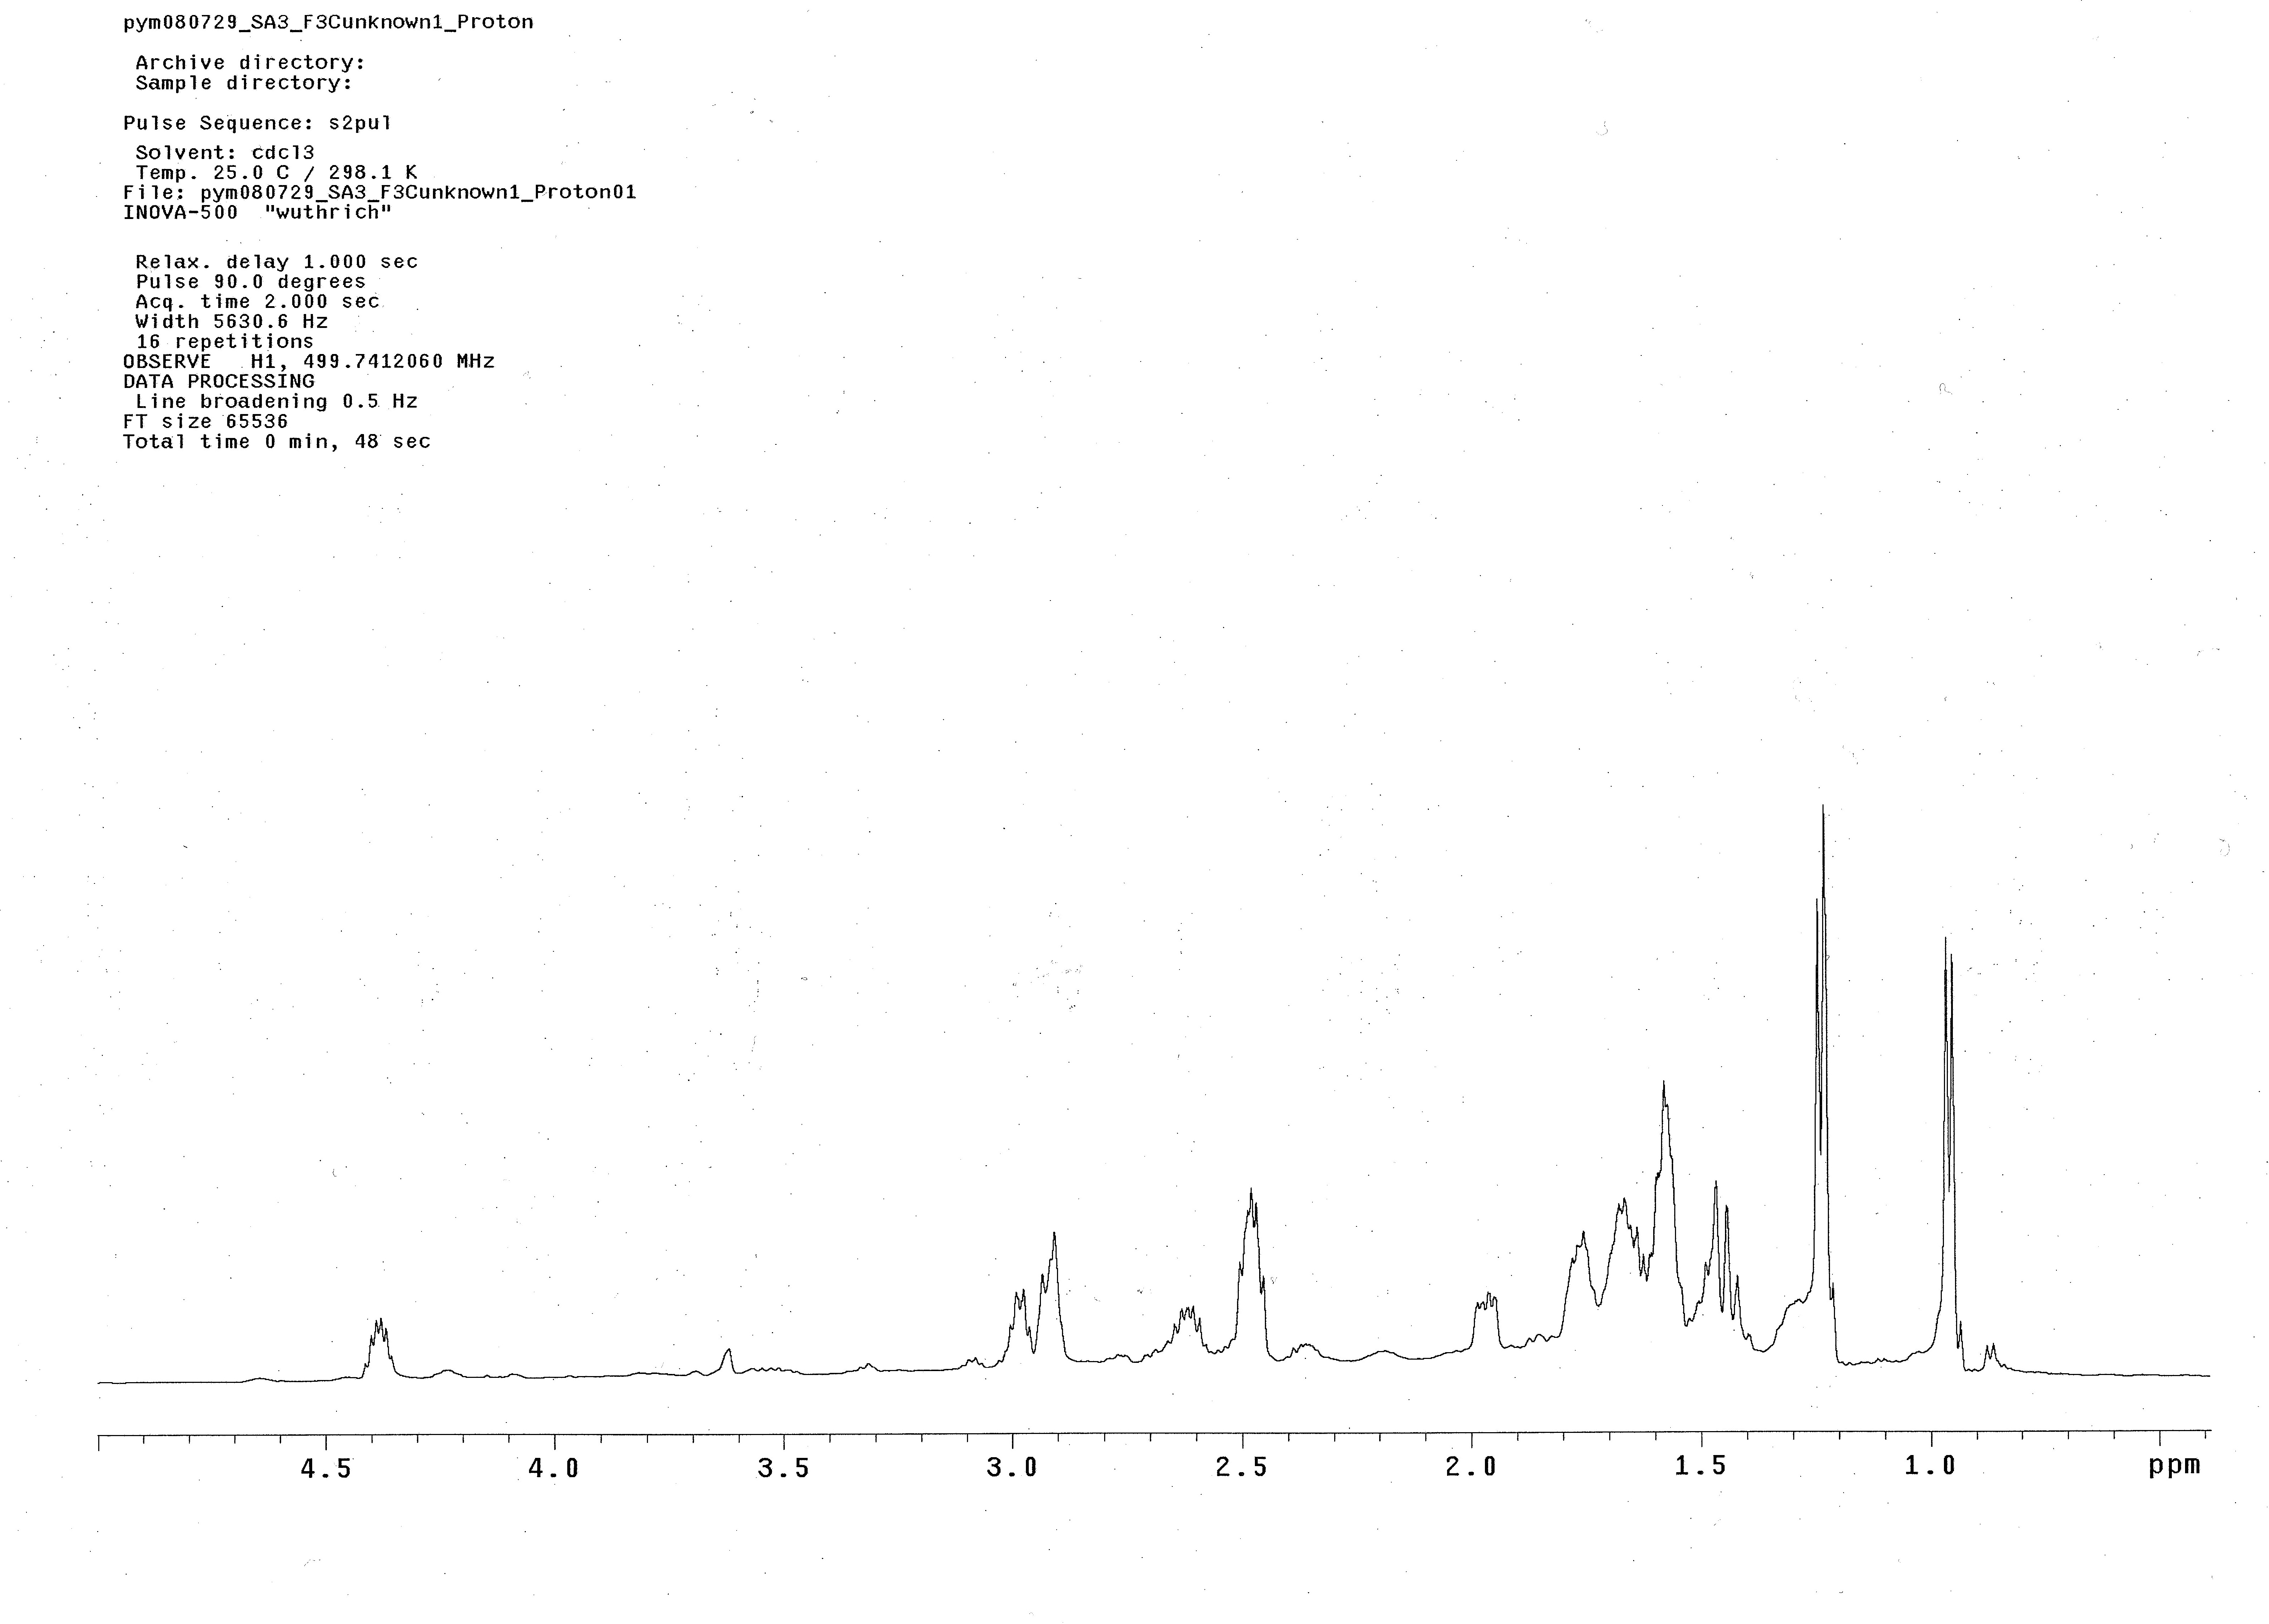
**

SI-2

**1H NMR (CDCl3) of 5**





**Table of HMBCcorrelations for Compounds 4 and 5.**

| position | HMBC | |
| --- | --- | --- |
| **4** | **5** |
| 1  2  3  5  6  7  8  9  9a  10  11  12  13  14  15  16  17 | H-2, H-3  -  -  H-3  -  H-5  -  H-17  H-3,H-5, H-6  H-8, H-9, H-11  -  H-10, H-11, H-13  H-14  H-13,H-16  H-13, H16  -  - | H-3  H-9a  H-5  H-8  H-5  H-5  H-9a  H-17  -  H-17, H-8  -  H-11, H-13  H-14, H-16  H-16  H-16  -  - |

SI-4

**GC-MS trace of the crude CH2Cl2 extract**

Total ion current

22.5

25.0

27.5

30.0

32.5

35.0

37.5

40.0

42.5

45.0

0.25

0.50

0.75

1.00

1.25

(x10,000,000)

**1**

**2**

**3**

**42**

**1**

**551**

**6**

Time (min)

**Table of EIMS details**

SI-5

| peak no. [RT (min)] | M∙+ (*m/z*) | fragment ions (*m/z*) | compound |
| --- | --- | --- | --- |
| 1 [28.3] | 277 | 262 (2%), 180 (100%) | **11** |
| 2 [29.0] | 279 | 264 (14%), 180 (25%), 166 (76%), 138 (24%) | **4** |
| 3 [30.5] | 258 | 277 (5%), 137 (15%), 121 (95%) | **12** |
| 4 [39.2] | 403 | 387 (28%), 232 (25%), 204 (93%), 162 (95%) | **2** |
| 5 [44.1] | 385 | 230 (9%), 202 (32%), 160 (95%) | **3** |
| 6 [45.1] | 387 | 232 (26%), 204 (95%), 162 (94%) | **1** |

**Tables of the biological activities of the CH2Cl2 extract and 4**

**Table1** Minimum Concentration of Sample Required to Inhibit AChE as Indicated by a White Zone of Inhibition.

| compound | minimum inhibitory requirement | |
| --- | --- | --- |
| ng nmole | |
| physostigmine | 0.1 | 3.6 x 10-4 |
| **4** | 50 | 0.18 |
| crude CH2Cl2 extract | 10 | - |

**Table2** Antibacterial Activity Expressed as Minimum Inhibitory (MIC) and Minimum Bactericidal Concentrations (MBC), in (µg/mL).

| bacteria | sample | | | | | |
| --- | --- | --- | --- | --- | --- | --- |
| gentamicin | | crude CH2Cl2 extract | | **4** | |
| MIC | MBC | MIC | MBC | MIC | MBC |
| *E. coli* | 5.62 | 5.62 | 625 | 1250 | 62.5 | 125 |
| *S. aureus* | 5.62 | 22.5 | 1250 | 2500 | 125 | 250 |
| *Ps. aeruginosa* | 0.35 | 1.46 | 625 | 625 | 62.5 | 125 |

**Table3** Antifungal Activity Expressed as Minimum Inhibitory (MIC) and Minimum Fungicidal Concentrations (MFC), in (µg/mL).

| fungus | sample | | | | | |
| --- | --- | --- | --- | --- | --- | --- |
| amphotericin B | | crude CH2Cl2 extract | | **4** | |
| MIC | MFC | MIC | MFC | MIC | MFC |
| *C. albicans* | 0.35 | 0.70 | 625 | 1250 | 125 | 125 |

SI-6
